# Supplementary material for: Regulation of the First Committed Step in Lipopolysaccharide Biosynthesis Catalyzed by LpxC Requires the Essential Protein LapC (YejM) and HslVU Protease
Source: PubMed Central journal article supplement (PMC7730581; doi:10.3390/ijms21239088), 2020-11-29
Supplement: ijms-21-09088-s001.pdf [file ijms-21-09088-s001.pdf]

# Regulation of the First Committed Step in Lipopolysaccharide Biosynthesis Catalyzed by LpxC Requires the Essential Protein LapC (YejM) and HslVU Protease

Daria Biernacka, Patrycja Gorzelak, Gracjana Klein\* and Satish Raina\*

Unit of Bacterial Genetics, Gdansk University of Technology, Narutowicza 11/12, 80-233 Gdansk, Poland

\* Correspondence: [gracjana.klein@pg.edu.pl](mailto:gracjana.klein@pg.edu.pl) (G.K.); [satish.raina@pg.edu.pl](mailto:satish.raina@pg.edu.pl) (S.R.);

Tel.: +48-58-347-2618 (G.K. & S.R.)

**Keywords:** lipopolysaccharide; LapB; LapC; YejM; LpxC; HslV/U protease; FabZ; RpoE

## Supplementary Materials

**Table S1.** Bacterial strains and plasmids used in this study

| Strains/Plasmids | Relevant characteristic                                                                                                | Reference or source |
|------------------|------------------------------------------------------------------------------------------------------------------------|---------------------|
| <b>Strains</b>   |                                                                                                                        |                     |
| BW25113          | <i>lacI<sup>q</sup> rrrnB<sub>T14</sub> ΔlacZ<sub>WJ16</sub> hsdR514 ΔaraBAD<sub>AH33</sub> ΔrhaBAD<sub>LD78</sub></i> | [65]                |
| T7 Express       | <i>lysY/I<sup>q</sup> MiniF lysY fhuA2 lacZ::T7 gene1 [lon] ompT</i>                                                   | NEB                 |
| GK1942           | BW25113 (pKD46)                                                                                                        | [17]                |
| SR7753           | BW25113 ( <i>lapB</i> ) $\langle$ <i>aph</i>                                                                           | [17]                |
| SR9523           | BW25113 ( <i>lapB</i> ) $\langle$ <i>frt</i>                                                                           | [17]                |
| SR8348           | SR7753 <i>lapC</i> 377fs                                                                                               | This study          |
| SR16087          | BW25113 <i>lapA-lapB</i> $\langle$ <i>cat</i>                                                                          | [17]                |
| SR17187          | BW25113 <i>lapA-lapB</i> $\langle$ <i>aph</i>                                                                          | [17]                |
| SR19796          | SR17187+ <i>phslV</i> <sup>+</sup>                                                                                     | This study          |
| SR17432          | BW25113 $\phi$ ( <i>rpoEP6-lacZ</i> )                                                                                  | [17]                |
| SR18868          | BW25113 $\phi$ ( <i>rpoEP2/P3-lacZ</i> )                                                                               | [18]                |
| SR18987          | BW25113 $\phi$ ( <i>rpoEP2*-lacZ</i> -12 and -24 mut)                                                                  | [18]                |
| SR19041          | SR18987 <i>lapC</i> 190 stop                                                                                           | This study          |
| SR19750          | SR18987 <i>lapC</i> 377fs                                                                                              | This study          |
| SR22861          | SR18987 <i>lapC</i> 377fs                                                                                              | This study          |
| SR22862          | SR18987 <i>lapC</i> F349S                                                                                              | This study          |
| GK6075           | BW25113 $\Delta$ <i>lapC</i> 190                                                                                       | This study          |
| GK6078           | GK6075 <i>lpxC</i> K270T                                                                                               | This study          |
| GK6093           | GK6075 <i>lpxC</i> V37G                                                                                                | This study          |
| SR22727          | GK6075 <i>lpxC</i> R230C                                                                                               | This study          |
| SR22728          | GK6075 <i>lpxC</i> R230C                                                                                               | This study          |
| SR22729          | GK6075 <i>lpxC</i> R230C                                                                                               | This study          |
| SR22731          | GK6075 <i>lpxC</i> V37G                                                                                                | This study          |
| SR22732          | GK6075 <i>lpxC</i> V37G                                                                                                | This study          |
| SR22738          | GK6075 <i>lpxC</i> V37L                                                                                                | This study          |
| SR22739          | GK6075 <i>lpxC</i> V37G                                                                                                | This study          |
| GK6094           | GK6075 <i>lpxC</i> fs306 stop codon                                                                                    | This study          |
| GK6085           | GK6075 <i>lapA</i> IS after 34 nt                                                                                      | This study          |

|         |                                                        |            |
|---------|--------------------------------------------------------|------------|
| GK6089  | GK6075 <i>lapA</i> fs 137 nt                           | This study |
| GK6090  | GK6075 <i>lapA</i> IS after 103 nt                     | This study |
| GK6097  | GK6075 <i>lapA</i> L8 to TGA stop codon                | This study |
| SR22734 | GK6075 <i>lapA</i> IS after 34 nt                      | This study |
| SR22736 | GK6075 <i>lapA</i> FS after 69 nt                      | This study |
| SR22737 | GK6075 IS at -106 in <i>lapAB</i> promoter region      | This study |
| GK6084  | GK6075 <i>lapB</i> D124Y                               | This study |
| GK6087  | GK6075 <i>lapB</i> R125L                               | This study |
| SR22724 | GK6075 <i>lapB</i> H325P                               | This study |
| SR22725 | GK6075 <i>lapB</i> H325L                               | This study |
| SR22726 | GK6075 <i>lapB</i> A88V                                | This study |
| SR22733 | GK6075 <i>lapB</i> R115H                               | This study |
| GK6095  | GK6705 <i>ftsH</i> A296V                               | This study |
| SR22766 | BW25113 $\Delta$ <i>hslUV</i> $\rightarrow$ <i>aph</i> | This study |
| SR22776 | SR18987 <i>lapC190</i>                                 | This study |
| SR22777 | SR17432 <i>lapC190</i>                                 | This study |
| SR22433 | SR18987 <i>lapC377fs</i>                               | This study |

### Plasmids

|          |                                                                                                        |                |
|----------|--------------------------------------------------------------------------------------------------------|----------------|
| pET24b   | expression vector                                                                                      | Our collection |
| pET28b   | expression vector                                                                                      | Our collection |
| pCP20    | ts replicon with inducible FLP recombinase                                                             | [65]           |
| pKD3     | <i>oriR6K<sub>s</sub></i> , <i>bla</i> (Amp <sup>R</sup> ), <i>kan</i> , <i>rgnB</i> (Ter), <i>cat</i> | [65]           |
| pKD13    | <i>oriR6K<sub>s</sub></i> , <i>bla</i> (Amp <sup>R</sup> ), <i>kan</i> , <i>rgnB</i> (Ter)             | [65]           |
| pKD46    | <i>araBp-gam-bet-exo</i> , <i>bla</i> (Amp <sup>R</sup> ), <i>repA101</i> (ts)                         | [65]           |
| pCA24N   | IPTG-inducible expression vector cm <sup>R</sup>                                                       | [40]           |
| pSR19788 | <i>hslV</i> <sup>+</sup> in pCA24N                                                                     | This study     |
| pSR19796 | <i>hslVU</i> <sup>+</sup> in pCA24N                                                                    | This study     |
| JW2176   | <i>lapC</i> <sup>+</sup> in pCA24N                                                                     | [40]           |
| pSR22821 | <i>hslVU</i> <sup>+</sup> in pET24b                                                                    | This study     |
| pSR22901 | <i>lapC</i> <sup>+</sup> in pET28b                                                                     | This study     |

**Table S2. Primers**

**For gene disruption:**

*lapC* For 5'-CTC TAT CAA CGA AGA CAA AGC GCA CTA AGG GAA ACA GAT AAC AGG  
TTA TGA TTC CGG GGA TCC GTC GAC CC-3'

*lapC* Rev 5'-AGA TAT TTC GCT AAC TGA TTT ATA ATT AAT CAG TTA GCG ATA AAA  
CGC TTT GTA GGC TGG AGC TGC TTC G-3'

**For cloning and overexpression of specific genes:**

*lapC* For 5'-CCG CAT CCC ATG GCT AAA ATT AAA CAT CAC CAT CAC CAT CAC CAC  
CAT CAC CAT ATG GTA ACT CAT CGT CAG C-3'

*lapC* Rev 5'-GCA AGT AAG AGA ATT CGC TAA CTG-3'

*hslV* For 5'-AGG GGT CAG CAT ATG ACA ACT ATA GTA AG-3'

*hslU* Rev 5'-GAT TGA ACG CTC GAG TCA TTA ATG ATG ATG GTG ATG ATG TAG GAT  
AAA ACG GCT CAG-3'

**For sequencing and PCR amplification:**

*lapC* For 5'-GCG CCT TAC AGT CCT CTA TCA AC-3'

*lapC* Rev 5'-CGT TTT CCA CAC CGA TTG CAA G-3'

*lapA* For 5'-GTT GAT TTC GTG GGC GCT GGT G-3'

*lapB* Rev 5'-GTC GTT GCC GGA GCA CAA TGG-3'

*ftsH* For 5'-GGA TAT AGA GTA TCC TGA CGC-3'

*ftsH* Rev 5'-CGG TAC AAA TAC AGT CAT CTG-3'

**For q-RT-PCR:**

*qlapC* For 5'-ATT CGC AAG GTC AGG ATT TG-3'

*qlapC* Rev 5'-GCG ATA AAA CGC TTC TCG TC-3'
